# Supplementary material
Source: PubMed Central journal article supplement (PMC4821367)
Supplement: NIHMS58300-supplement-1.pdf [file NIHMS58300-supplement-1.pdf]

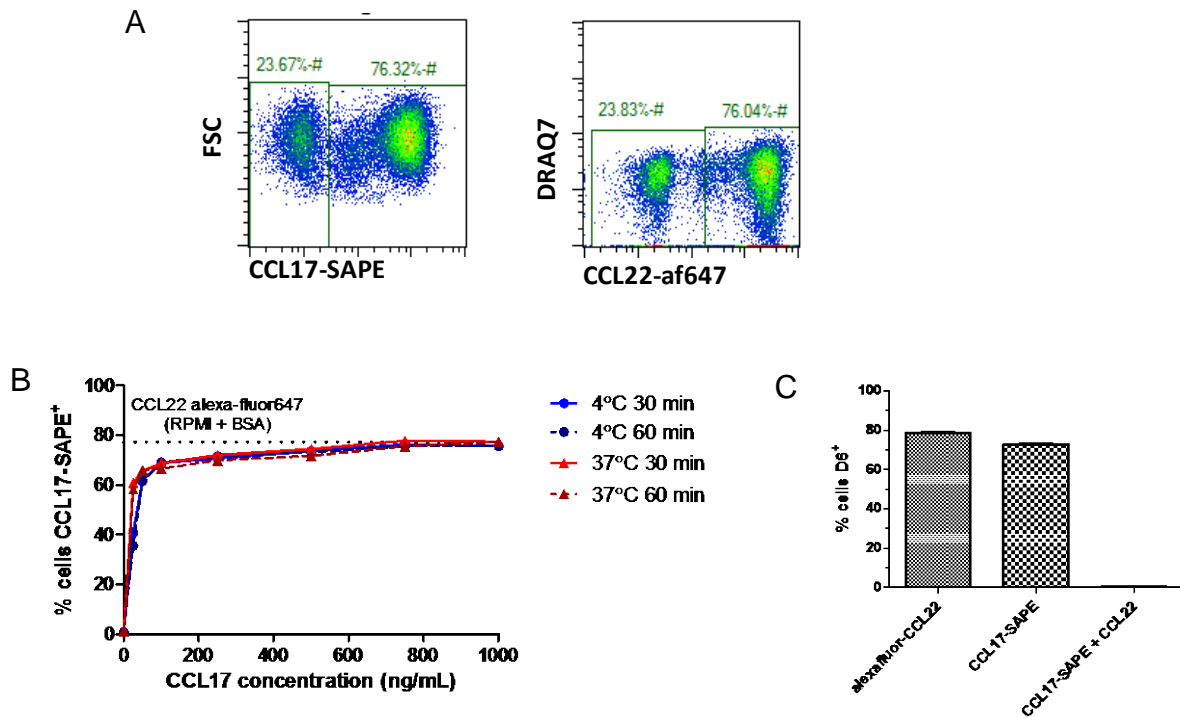

## Supplemental Figure 1

CCL17-SAPE can also be used to visualise chemokine receptors on transfected cells.

(A) D6 transfected HEK cells were labelled at 37°C with either 600 ng/mL CCL17-SAPE or alexa-fluor647-conjugated CCL22 as a positive control and D6 expression detected at a level of approximately 76%.

(B) CCL17-SAPE at 37°C and concentrations above 100ng/mL can label cells for D6 expression as well as CCL22.

(C) CCL17-SAPE binding is specific to D6, as shown by a competition assay with native CCL22. Addition of CCL22 at a 20X molar excess inhibited binding by CCL17-SAPE to the D6<sup>+</sup> HEKs at 37°C.

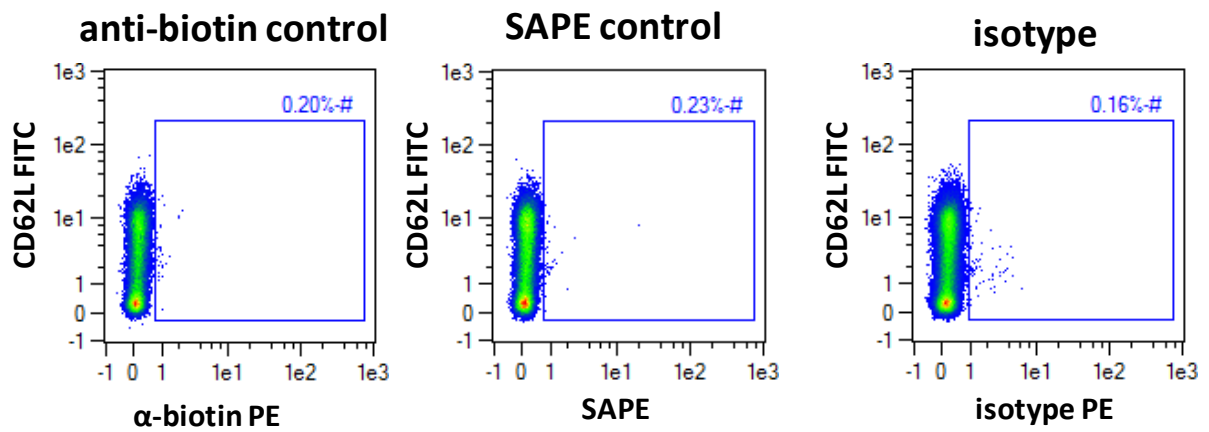

### Supplemental Figure 2

Controls showing the lack of non-specific binding of secondary detection agents to peripheral blood leukocytes.
